# Supplementary material for: Validation of Multi-Residue Method for Quantification of Antibiotics and NSAIDs in Avian Scavengers by Using Small Amounts of Plasma in HPLC-MS-TOF
Source: MDPI journal article supplement (doi:10.3390/ijerph17114058), 2020-06-06
Supplement: s1 [file s1]

**Supplementary Materials:** The following are available online at [www.mdpi.com/xxx/s1](http://www.mdpi.com/xxx/s1),

**Figure S1:** Chromatograms of each antibiotic and NSAID and their mass spectra, detected by the validated method.

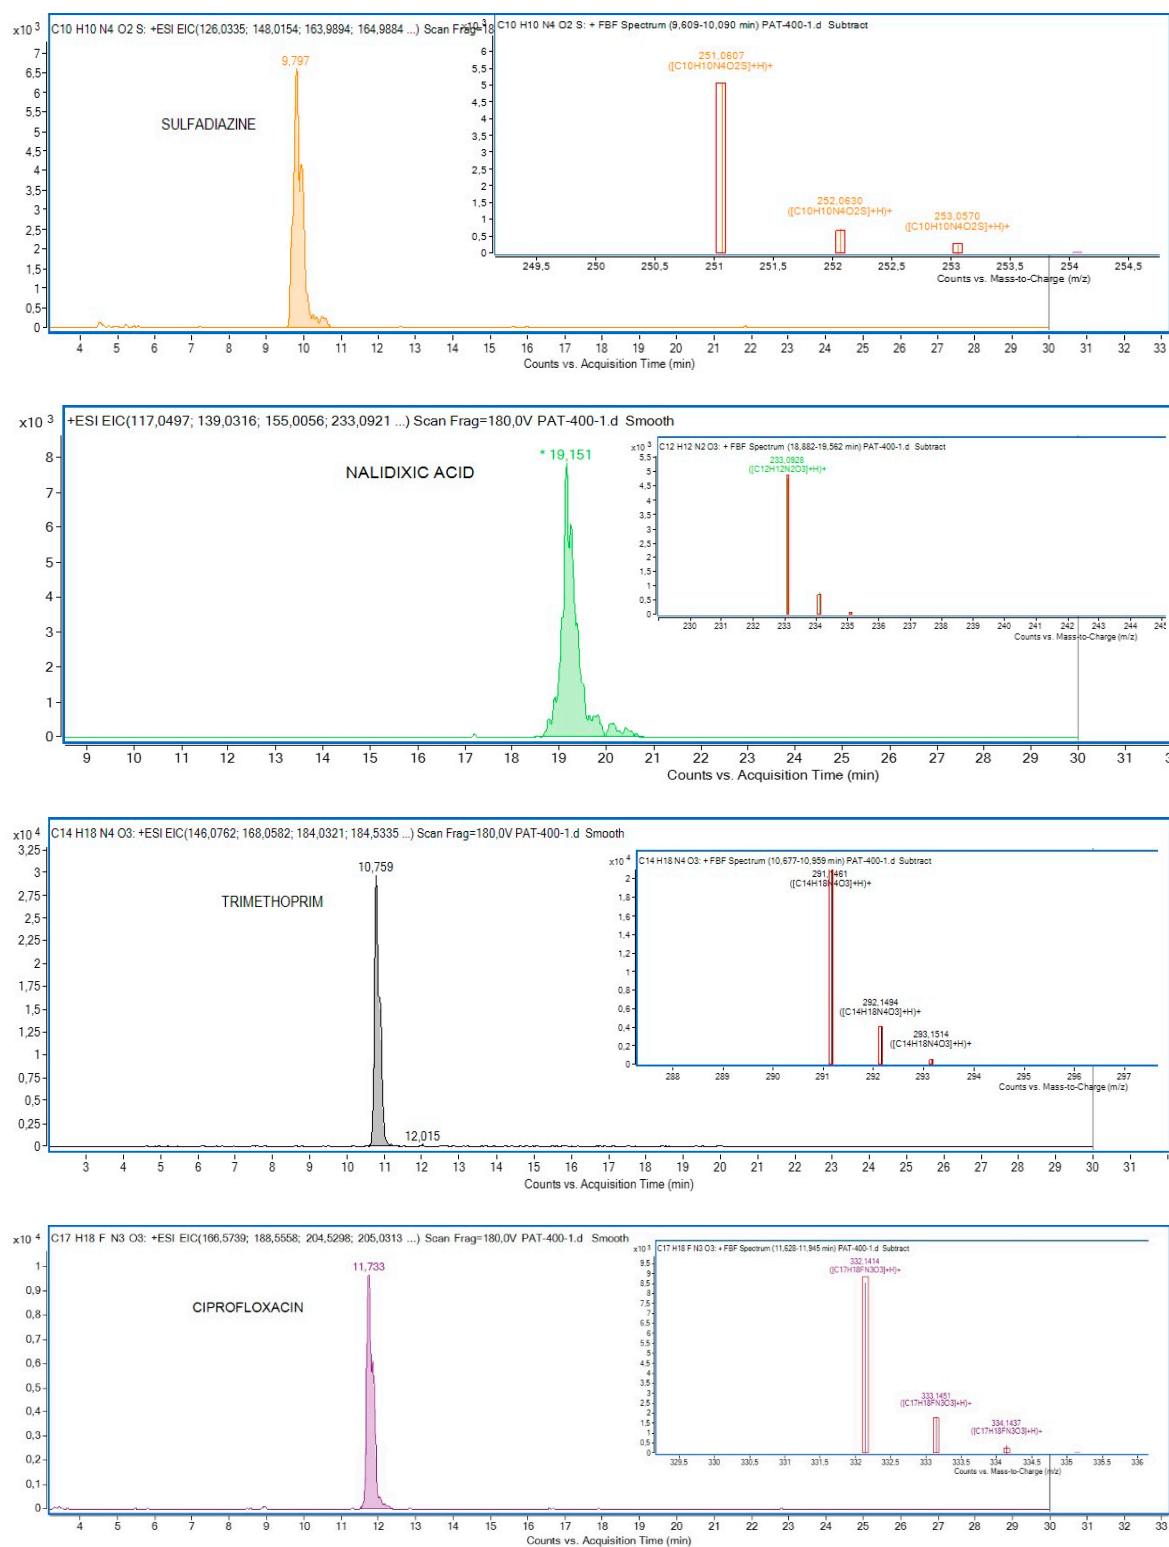

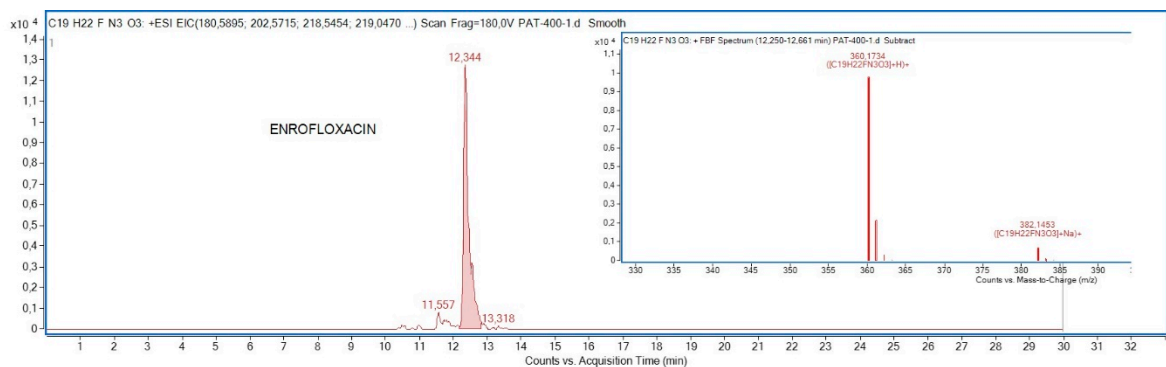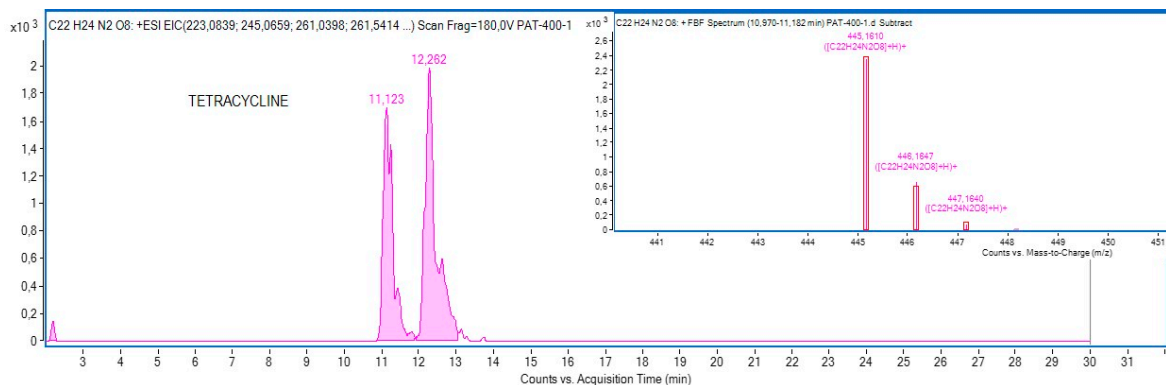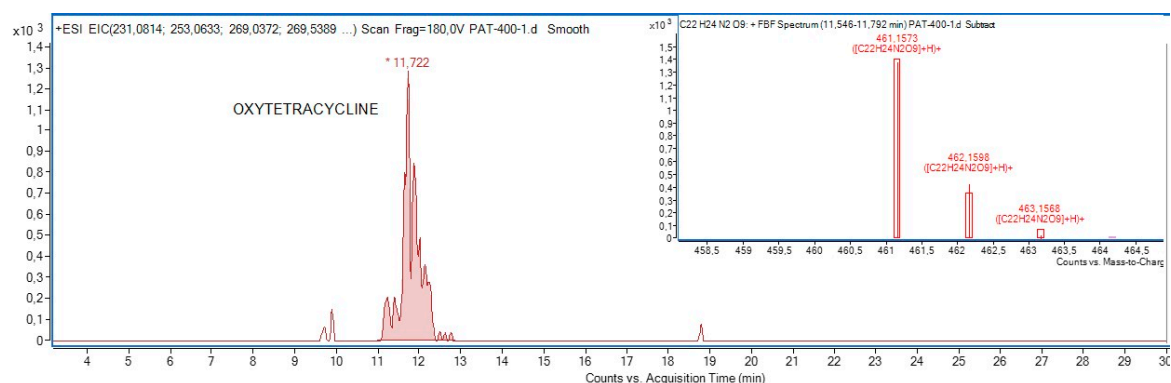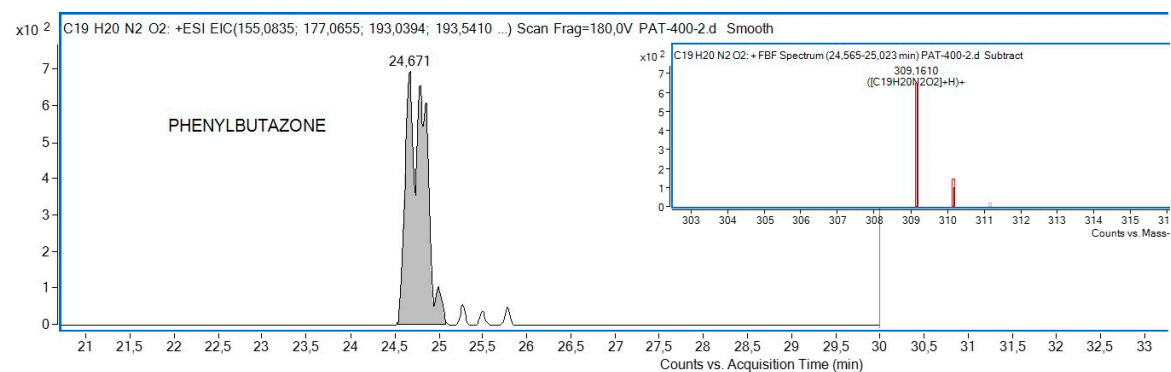

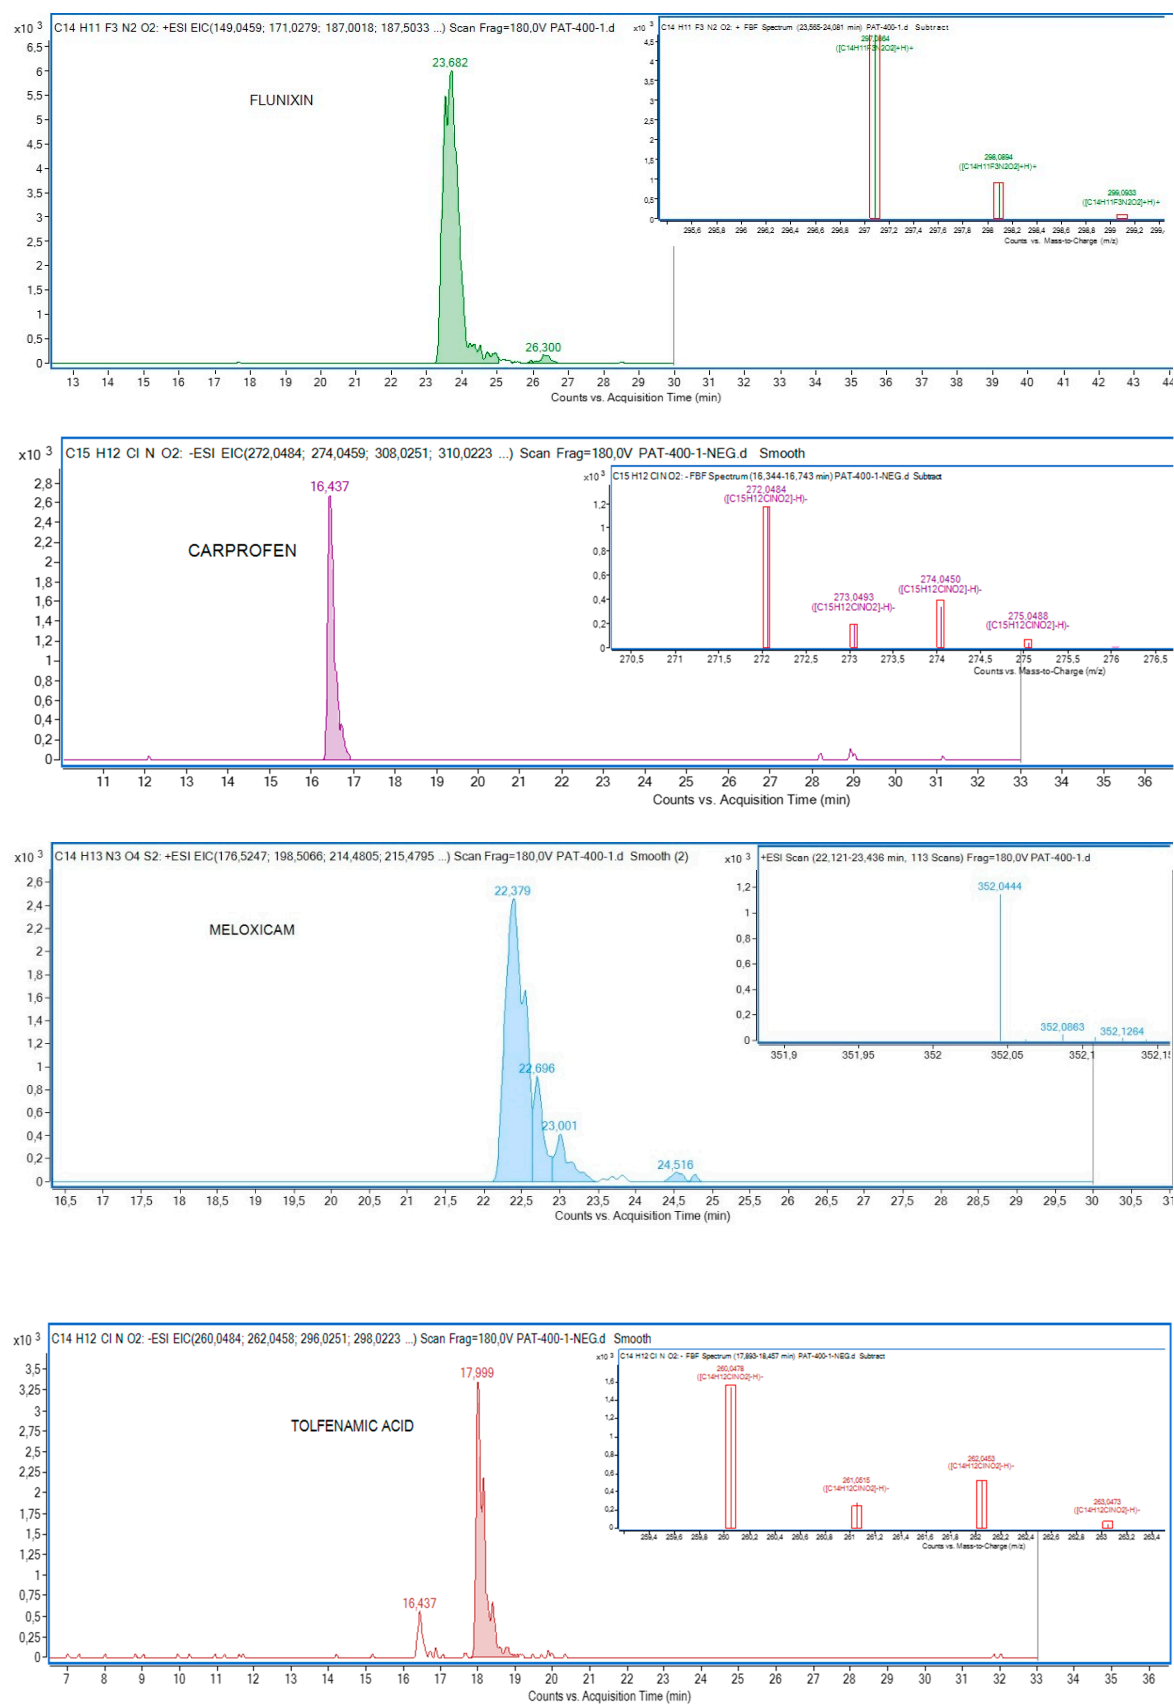

Figure S2. Chromatograms of some samples with the detected compounds.

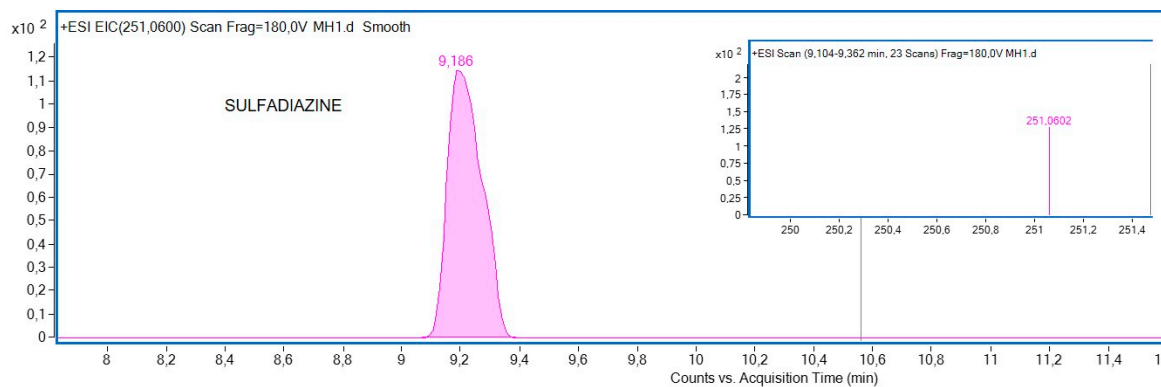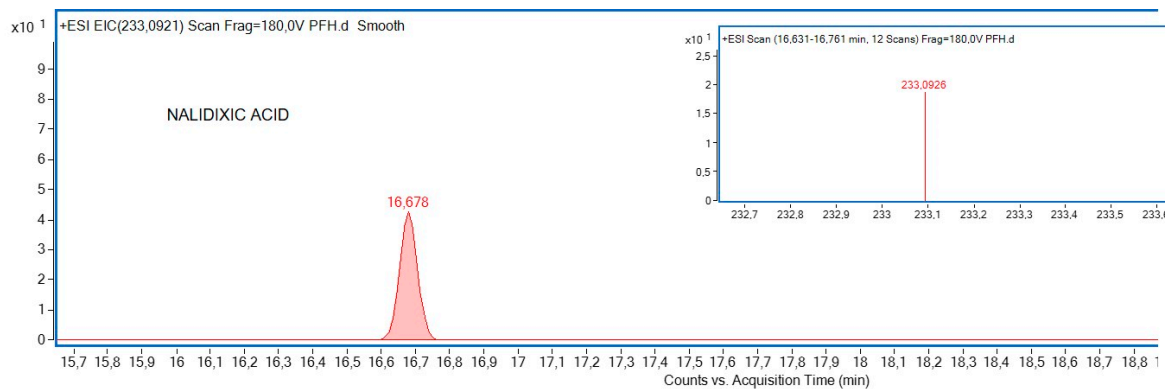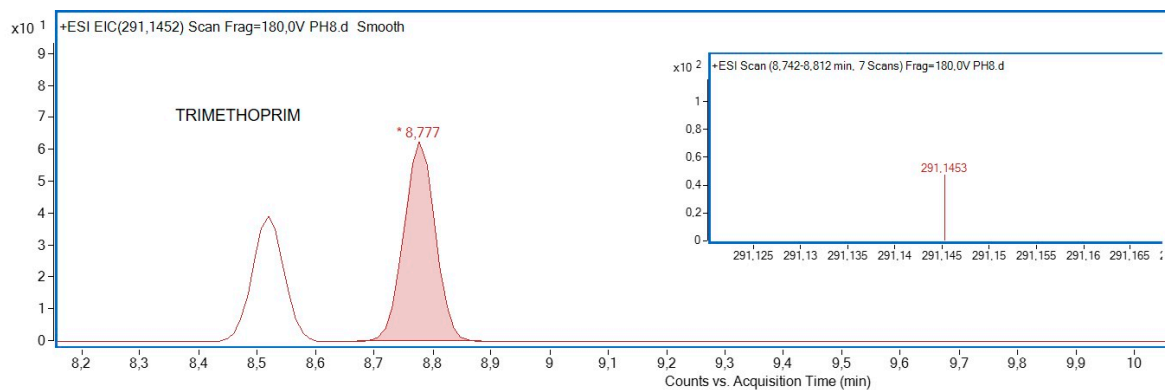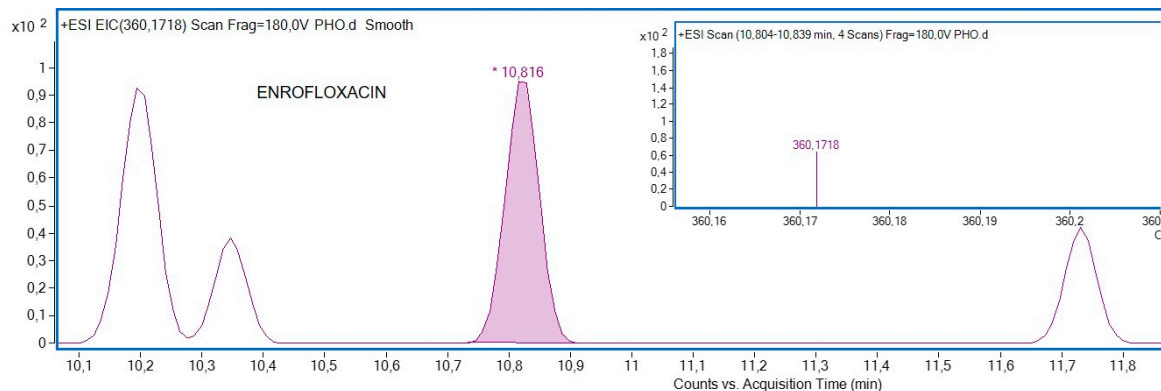

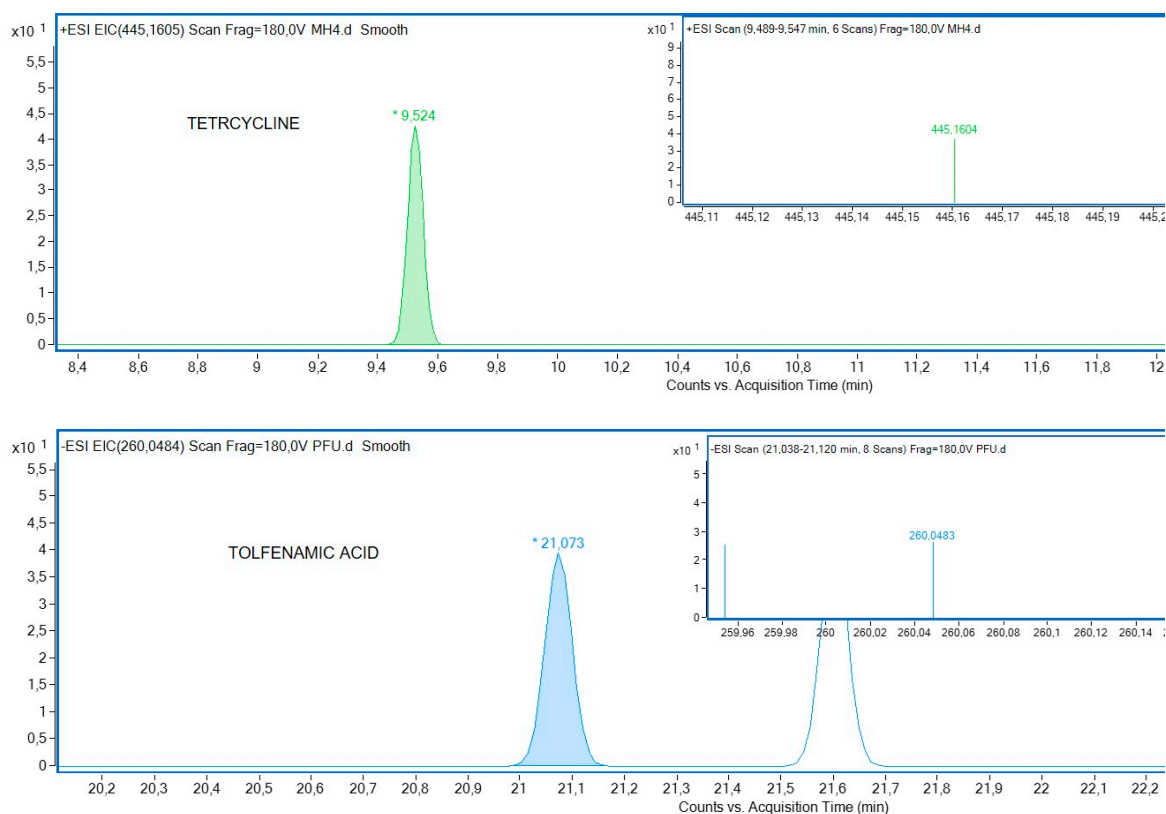

Table S1 List of compounds analysed and their corresponding data for identification in the HPLC-TOFMS analysis in plasma samples: molecular formula, theoretical masses of their adducts.  $\Delta$  ppm is the error of measurement of ion mass

| Compound        | Formula                 | Theoretical<br>$m/z$ $H^+$ | Theoretical<br>$m/z$ $H^-$ | $\Delta$<br>(ppm) |
|-----------------|-------------------------|----------------------------|----------------------------|-------------------|
| Sulfadiazine    | $C_{10}H_{10}N_4O_2S$   | 251.06                     | -                          | 3.59              |
| Nalidixic acid  | $C_{12}H_{12}N_2O_3$    | 233.093                    | -                          | 3.53              |
| Trimethoprim    | $C_{14}H_{18}N_4O_3$    | 291.146                    | -                          | 3.43              |
| Ciprofloxacin   | $C_{17}H_{18}FN_3O_3$   | 332.141                    | -                          | 2.6               |
| Enrofloxacin    | $C_{19}H_{22}FN_3O_3$   | 360.172                    | -                          | 2.72              |
| Tetracycline    | $C_{22}H_{24}N_2O_8$    | 445.161                    | -                          | 3.53              |
| Oxytetracycline | $C_{22}H_{24}N_2O_9$    | 461.156                    | -                          | 3.44              |
| Phenylbutazone  | $C_{19}H_{20}N_2O_2$    | 309.160                    | -                          | 4.4               |
| Flunixin        | $C_{14}H_{11}F_3N_2O_2$ | 297.085                    | -                          | 4                 |
| Carprofen       | $C_{15}H_{12}ClNO_2$    | -                          | 272,048                    | -1.51             |
| Meloxicam       | $C_{14}H_{13}N_3O_4S_2$ | 352.042                    | -                          | 5.6               |
| Tolfenamic acid | $C_{14}H_{12}ClNO_2$    | -                          | 260,048                    | -1.97             |
